# Supplementary material for: Trace Sc3+-electrolyte additive enabling stable Zn metal anodes for aqueous zinc-ion batteries
Source: Royal Society of Chemistry journal article supplement (doi:10.1039/d3cc04476a), 2023-01-01
Supplement: d3cc04476a1.pdf [file d3cc04476a1.pdf]

## Supplementary Information

### **Trace Sc<sup>3+</sup>-electrolyte additive enabling stable Zn metal anodes for aqueous zinc-ion batteries**

Chun Chen,<sup>a,b,c</sup> Liansheng Li<sup>b,c</sup> Zuxin Long,<sup>b,c</sup> and Qinghua Liang<sup>a,b,c,\*</sup>

- a. School of Rare Earth, University of Science and Technology of China, Hefei, Anhui 230026, P. R. China
- b. Key Laboratory of Rare Earth, Chinese Academy of Sciences, Ganzhou, Jiangxi 341000, P. R. China  
Ganjiang Innovation Academy, Chinese Academy of Sciences, Ganzhou, Jiangxi 341000, P. R. China

\*Corresponding authors.

E-mail: qhliang@gia.cas.cn

## Experimental Section

**Preparation of Electrolytes.** Deionized water (DI) obtained from an ultrapure water system was used to prepare all aqueous electrolytes.  $\text{ZnSO}_4 \cdot 7\text{H}_2\text{O}$  purchased from Aladdin Ltd., Shanghai was dissolved in deionized water to prepare the pristine 2.0 M  $\text{ZnSO}_4$  electrolyte. A stoichiometric amount of scandium sulfate ( $\text{Sc}_2(\text{SO}_4)_3$ ) (0.005 M, 0.01 M, 0.02 M) purchased from Aladdin Ltd., Shanghai was dissolved into 2.0 M  $\text{ZnSO}_4$  electrolytes to prepare  $\text{Sc}^{3+}$ -containing electrolytes. The  $\text{V}_2\text{O}_5$  nanobelt was prepared according to the method reported in the previous report.<sup>1</sup> The  $\text{V}_2\text{O}_5$  nanobelt cathode was prepared by grinding and mixing  $\text{V}_2\text{O}_5$  nanobelt, Super-P, and carboxy methyl cellulose (CMC) at a weight ratio of 7:2:1 for 10 mins. The mixture was dispersed with a quantity of deionized water to prepare the slurry under stirring at room temperature for 12 h. The prepared slurry was cast onto graphite paper and then dried in a vacuum oven at 90 °C for 12 h. The active carbon (AC) cathodes for Zn-ions hybrid capacitors (ZHCs) consisting of commercial AC, Super P, and CMC with a mass ratio of 7: 2: 1, were prepared by a similar procedure of  $\text{V}_2\text{O}_5$  cathode preparation. The stainless-steel foil was used as the current collector for the AC cathode.

**Material Characterizations.** The phase structures of Zn electrodes were characterized by a Bruker D8 Advance X-ray diffractometer (Cu-K $\alpha$ ,  $\lambda = 1.5418 \text{ \AA}$ ). The morphology of the plated Zn cycled under different test conditions was observed by scanning electron microscopy (SEM).

**Electrochemical measurements.** Cyclic voltammetry (CV) measurement of Zn plating/stripping was measured in a two-electrode cell, where Ti foil serves as the working electrode, and Zn plane acts as the counter electrode. Electrochemical impedance spectroscopy (EIS) of the Zn||Zn symmetric cell was recorded by a CHI660E electrochemical workstation from 100 kHz to 0.01 Hz at open-circuit voltage with an amplitude voltage of 5 mV under different temperatures. The nucleation overpotential was tested by Zn||Cu asymmetric cell at a current density of 2.0 mA cm<sup>-2</sup>. The Zn||Zn symmetric cells were assembled by sandwiching the glass fibre (Whatman GF/A) between two commercial Zn foil (100  $\mu\text{m}$ , 12 mm in diameter) in CR2032 coin-type cells filled with 60  $\mu\text{L}$   $\text{ZnSO}_4$  or  $\text{ZnSO}_4/\text{Sc}$  electrolytes. Zn||Cu asymmetric cells

were assembled by Zn foil (100  $\mu\text{m}$ , 12 mm in diameter), Cu foil (12 mm in diameter), and glass fibre. Zn||V<sub>2</sub>O<sub>5</sub> full cells filled with 70  $\mu\text{L}$  electrolytes were assembled using Zn foil (10  $\mu\text{m}$ , 10 mm in diameter) as the anode, V<sub>2</sub>O<sub>5</sub> nanobelt paper as the cathode, and glass fibre as the separator.

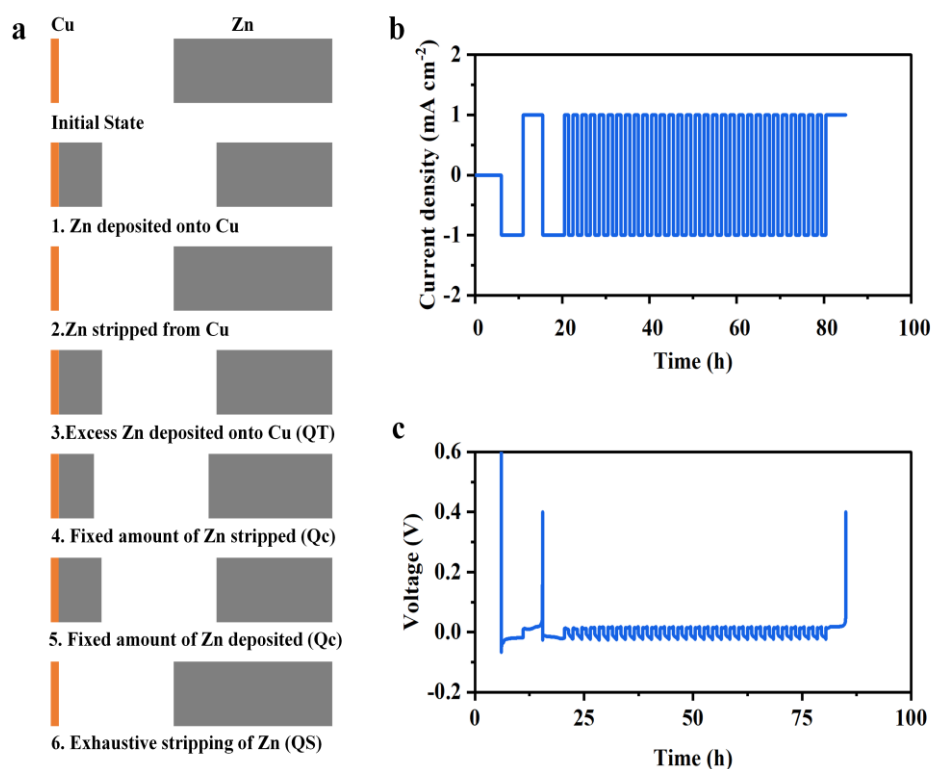

**Fig. S1** (a) The schematic illustration of an accurate method for testing the CE of Zn||Cu cell.<sup>1</sup> The Cu substrate is applied with one single Zn plating/stripping cycle at a current density of 1.0 mA cm<sup>-2</sup>, where the cycle is done by plating 5.0 mA h cm<sup>-2</sup> of Zn and then fully stripping the Zn to 0.4 V. Subsequently, 5.0 mA h cm<sup>-2</sup> charges of Zn were plated on Cu substrate again at a current density of 1.0 mA cm<sup>-2</sup> then stripping/plating cycling ( $Q_C=1.0$  mA h cm<sup>-2</sup>) for 30 cycles at 1.0 mA cm<sup>-2</sup>. During the final stripping process, the deposited Zn was stripped until the voltage exceeded 0.4 V. (b) The corresponding current density and (c) voltage-time plot.

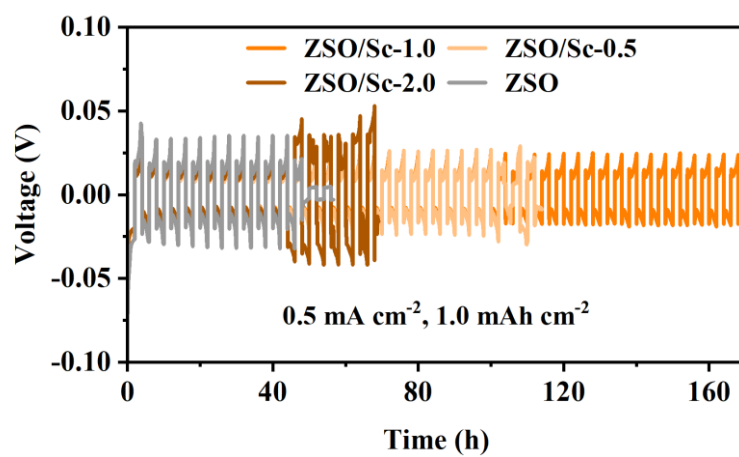

**Fig.S2** The long-term galvanostatic cycle performances of the Zn||Zn symmetric cells using different electrolytes at  $0.5 \text{ mA cm}^{-2}$  and  $1.0 \text{ mA h cm}^{-2}$ .

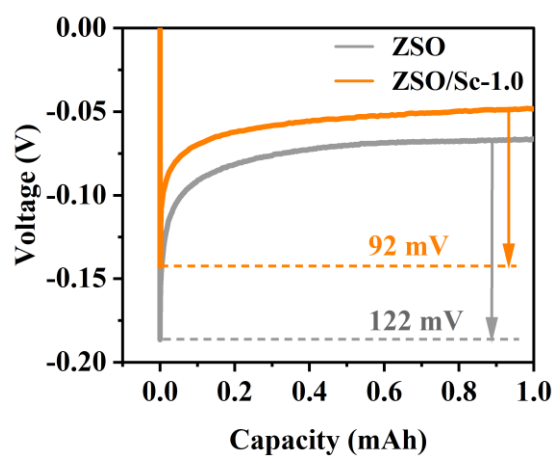

**Fig. S3** The nucleation overpotentials of Zn deposition on the Zn plate in the ZSO and ZSO/Sc-1.0 electrolytes at a current density of  $2.0 \text{ mA cm}^{-2}$ .

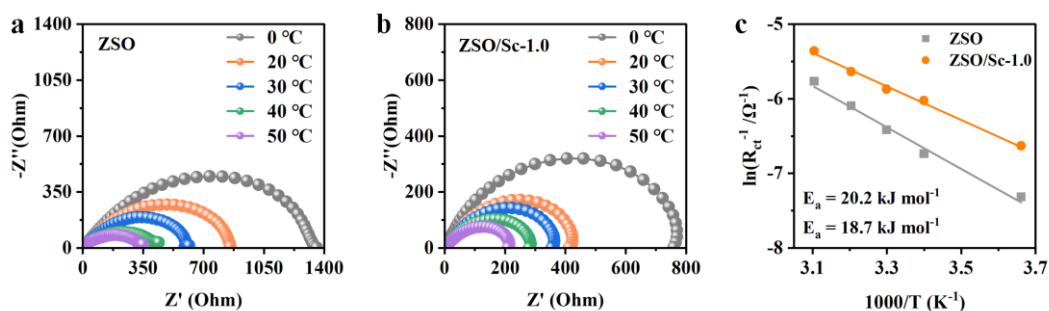

**Fig. S4** EIS results of the Zn||Zn symmetrical cells assembled by ZSO (a) and ZSO/Sc-1.0 electrolytes (b) at different temperatures recorded from 100 kHz to 0.01 Hz at the open-circuit voltage. (c) The temperature-dependent reciprocal resistances in ZSO and ZSO/Sc-1.0 electrolyte. Arrhenius equation ( $\ln(R_{ct}^{-1}) = \ln A - E_a/RT$ ) was used to calculate  $E_a$ , where  $R_{ct}$  is the charge transfer resistance,  $E_a$  is the activation energy,  $T$  is the absolute temperature, and  $R$  is the gas constant. The  $R_{ct}$  is obtained from the semicircle of the Nyquist plots of Zn||Zn symmetric cells tested at different temperatures. The  $E_a$  is calculated by linearly fitting  $\ln(1/R_{ct})$  versus  $1000/T$ .

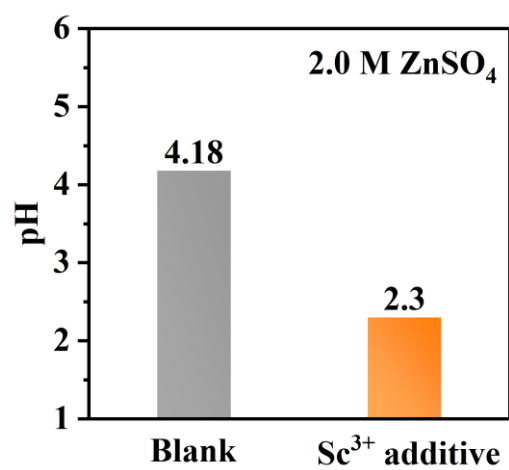

**Fig. S5** The pH values of the ZSO and ZSO/Sc-1.0 electrolytes tested at 24.8 °C.

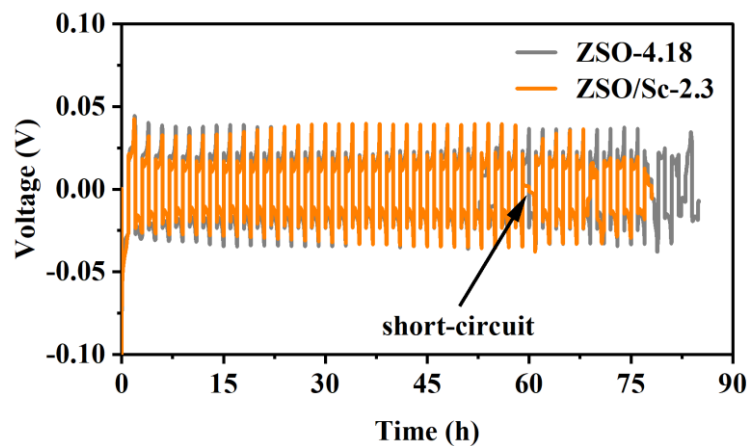

**Fig. S6** The long-term galvanostatic Zn stripping/plating of the Zn||Zn symmetric cells using ZnSO<sub>4</sub> electrolytes with different pH values. The ZSO-2.3 electrolyte was prepared by adding a certain amount of 0.1M H<sub>2</sub>SO<sub>4</sub> solution.



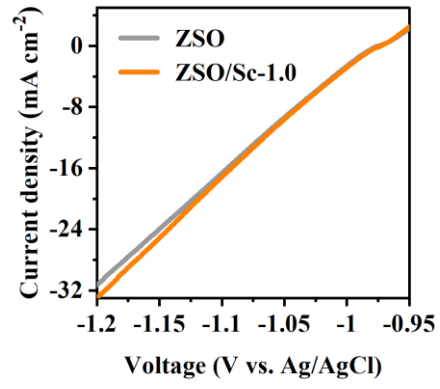

**Fig. S7** The LSV curve of ZnSO<sub>4</sub> electrolytes with/without Sc<sup>3+</sup> additive at a scan rate of 1.0 mV s<sup>-1</sup>.

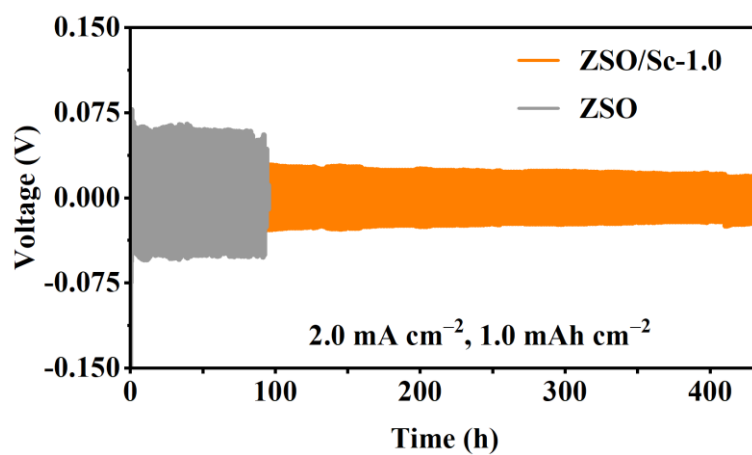

**Fig. S8** The charging and discharging curves of Zn||Zn cells with and without Sc<sup>3+</sup>-electrolyte additive at a current density of 2.0 mA cm<sup>-2</sup> and an areal capacity of 1.0 mA h cm<sup>-2</sup>.

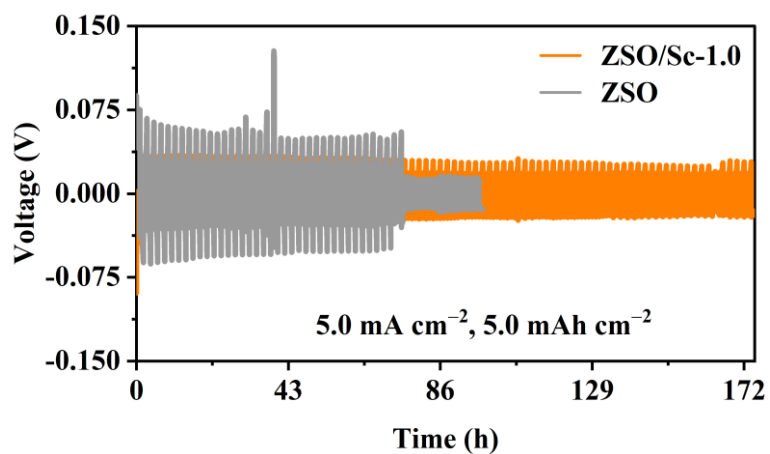

**Fig. S9** The charging and discharging curve of Zn||Zn cells with and without Sc<sup>3+</sup> at a current density of 5.0 mA cm<sup>-2</sup> and an areal capacity of 5.0 mA h cm<sup>-2</sup>

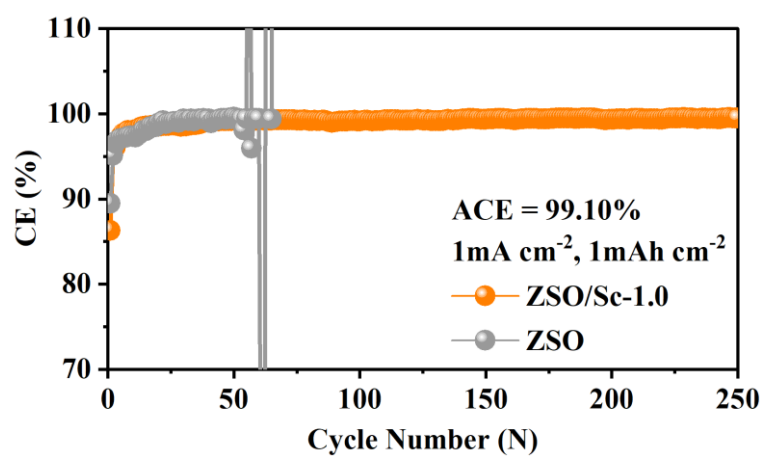

**Fig. S10** The CE of Zn||Cu cell with and without Sc<sup>3+</sup> at a current density of 1.0 mA cm<sup>-2</sup> and an areal capacity of 1.0 mA h cm<sup>-2</sup>.

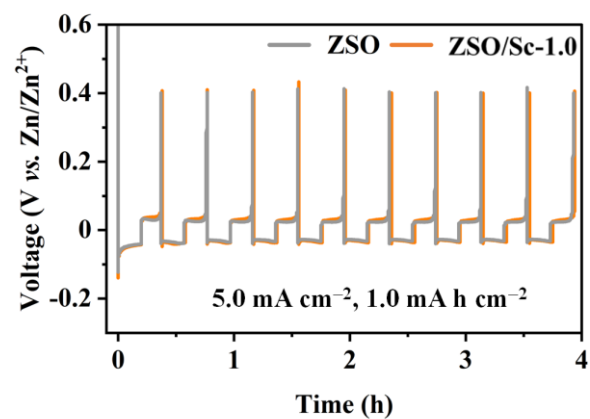

**Fig. S11** The voltage profile of Zn||Cu asymmetrical battery tested at a current density of  $5.0 \text{ mA cm}^{-2}$  and a areal capacity of  $1.0 \text{ mA h cm}^{-2}$ .

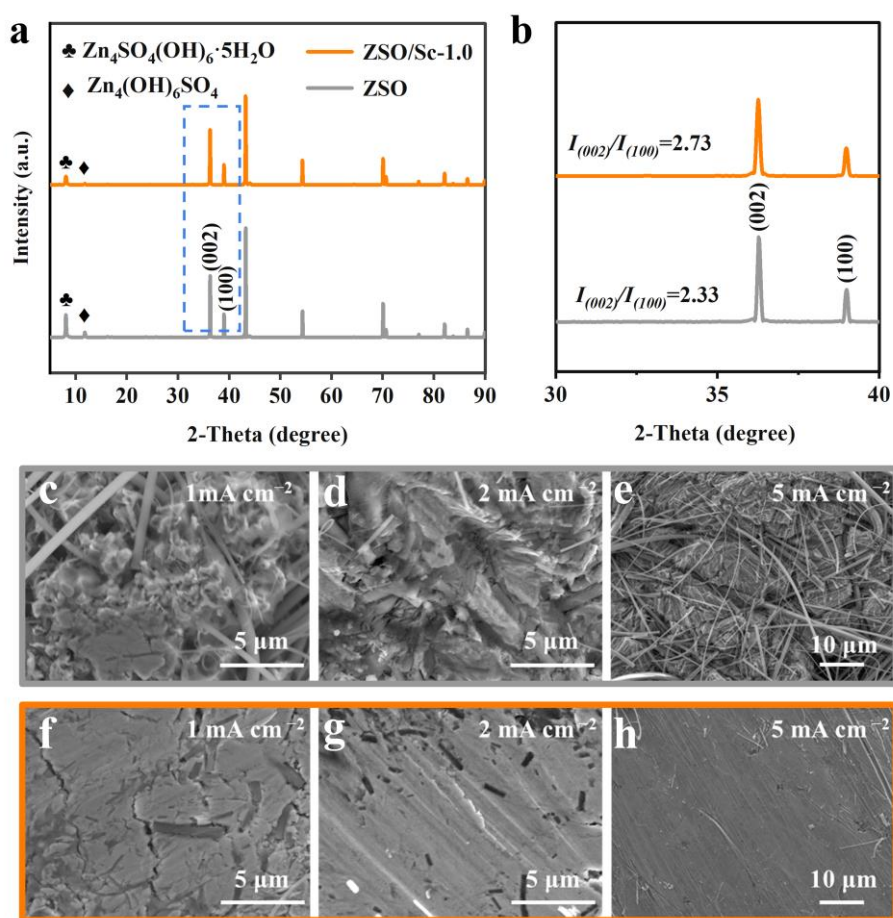

**Fig. S12** The structural analysis of plated Zn. (a, b) The XRD patterns of ZMAs disassembled from the Zn||Zn cells with ZSO and ZSO/Sc-1.0 electrolytes after 30 cycles at  $1.0 \text{ mA cm}^{-2}$  under  $1.0 \text{ mA h cm}^{-2}$ . The SEM images of Zn foils after plating Zn of  $2.0 \text{ mA h cm}^{-2}$  in the Zn||Zn cells with (c-e) ZSO and (f-h) ZSO/Sc-1.0 electrolyte at  $1.0$ ,  $2.0$ , and  $5.0 \text{ mA cm}^{-2}$ .

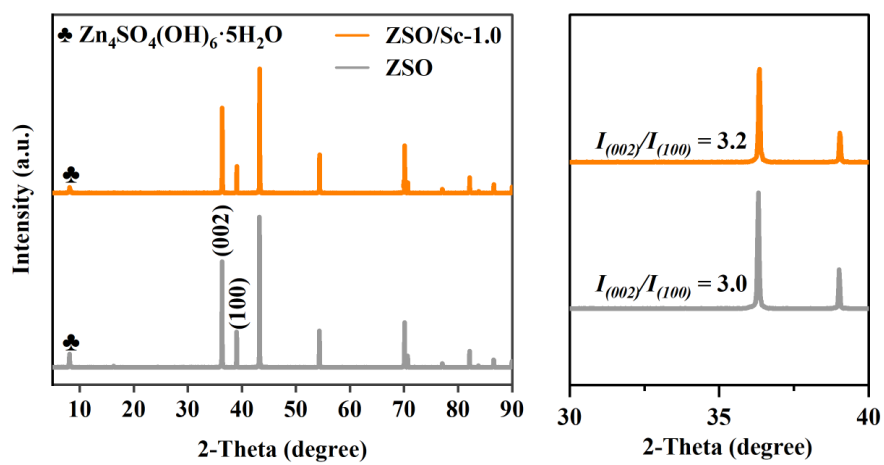

**Fig. S13** The XRD pattern of Zn metal anodes disassembled from the Zn||Zn cells with ZSO and ZSO/Sc-1.0 electrolytes after 50 cycles at a current density of  $5.0 \text{ mA cm}^{-2}$  with an areal capacity of  $1.0 \text{ mA h cm}^{-2}$ .

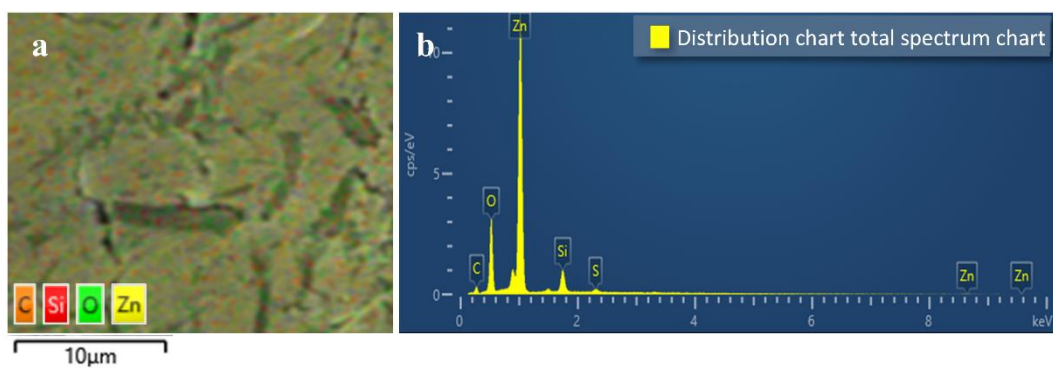

**Fig. S14** (a) EDX mapping image of the Zn disassembled from the Zn||Zn symmetrical cell assembled by ZSO/Sc-1.0 electrolyte and (b) the corresponding spectrum.



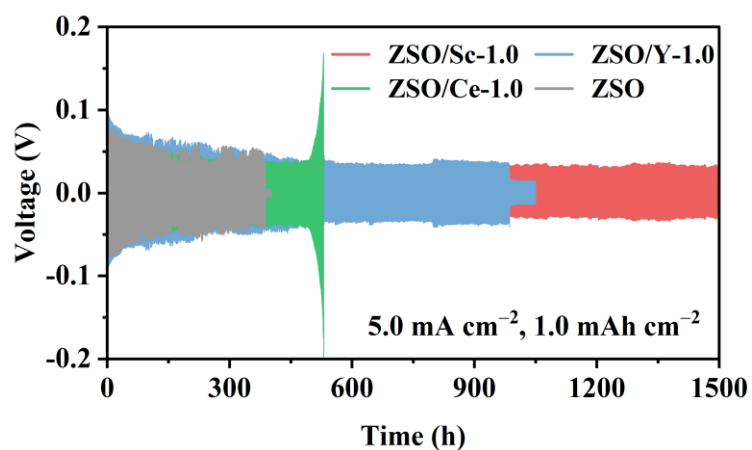

**Fig. S15** The long-term galvanostatic Zn stripping/plating of the Zn||Zn symmetric cells using ZSO electrolyte with different rare earth ions (1 mol%) at  $5.0 \text{ mA cm}^{-2}$  under  $1.0 \text{ mA h cm}^{-2}$ .

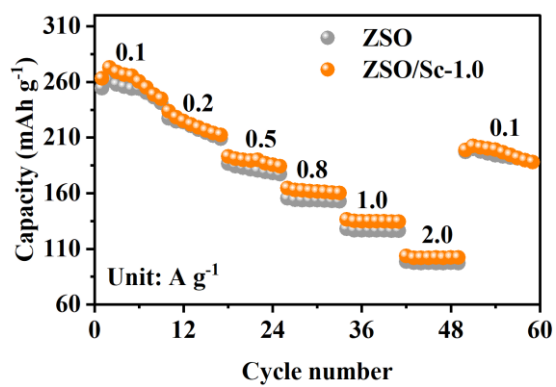

**Fig. S16** Rate performance of Zn||V<sub>2</sub>O<sub>5</sub> full cells with ZSO and ZSO/Sc-1.0 electrolytes.

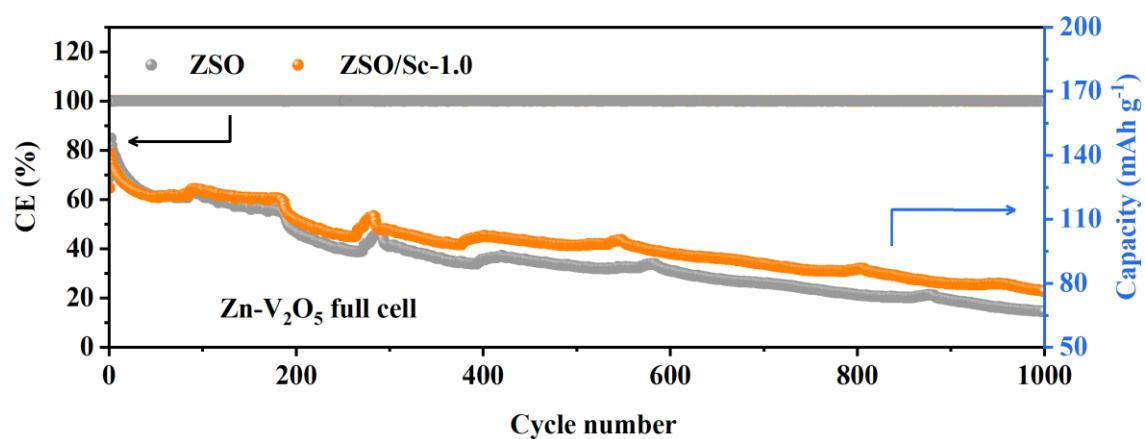

**Fig. S17** The cycle stability of Zn||V<sub>2</sub>O<sub>5</sub> full cells with ZSO and ZSO/Sc-1.0 electrolytes.

### 3. Reference

- 1 B. D. Adams, J. Zheng, X. Ren, W. Xu and J.-G. Zhang, *Adv. Energy Mater.*, 2018, **8**, 1702097.
